# Supplementary material for: Association of the advanced lung cancer inflammation index (ALI) with immune checkpoint inhibitor efficacy in patients with advanced non-small-cell lung cancer
Source: PubMed Central journal article supplement (PMC8417333; doi:10.1016/j.esmoop.2021.100254), 2021-09-01

A. Overall survival of patients with PD-L1 TPS = 50% according to treatment and ALI score

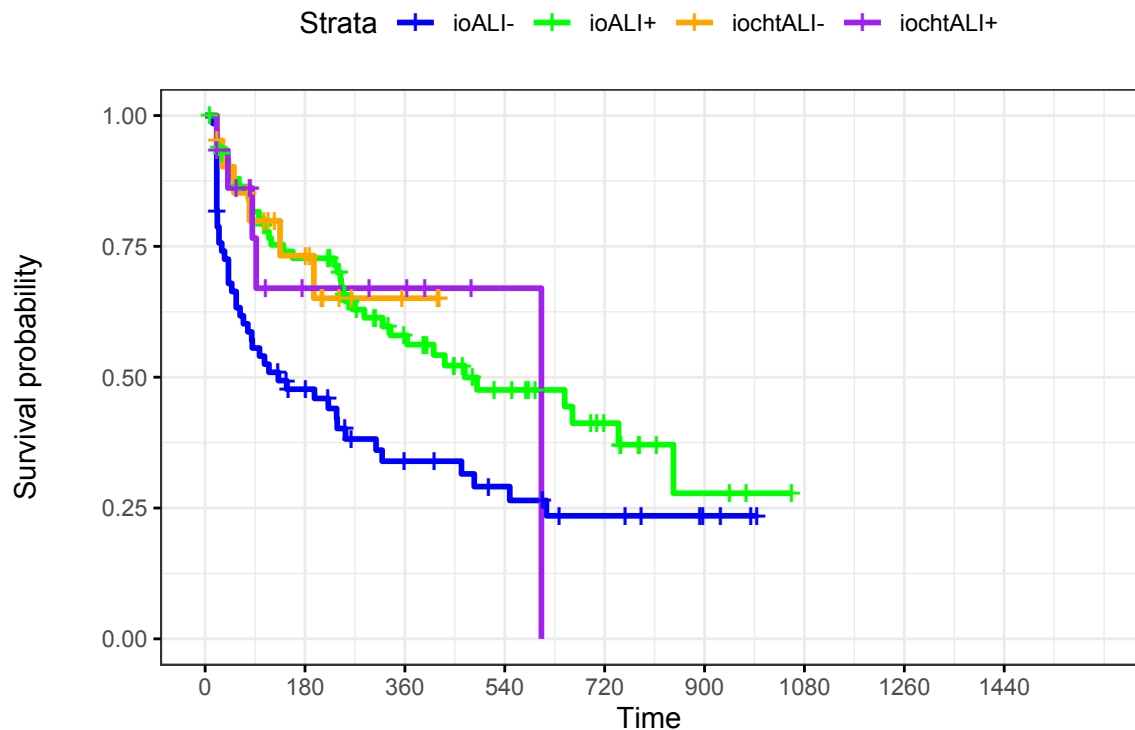

Number at risk

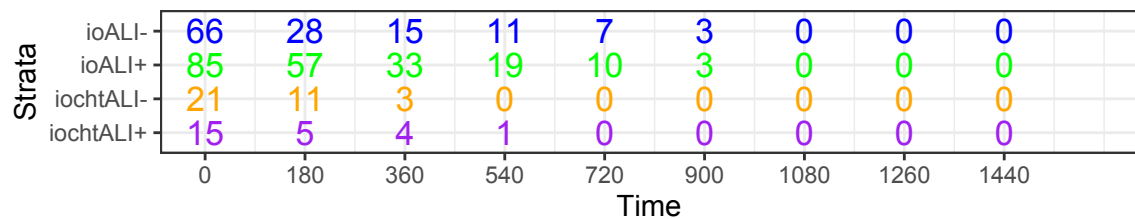

B. Time-on-treatment of patients with PD-L1 TPS = 50% according to treatment and ALI score

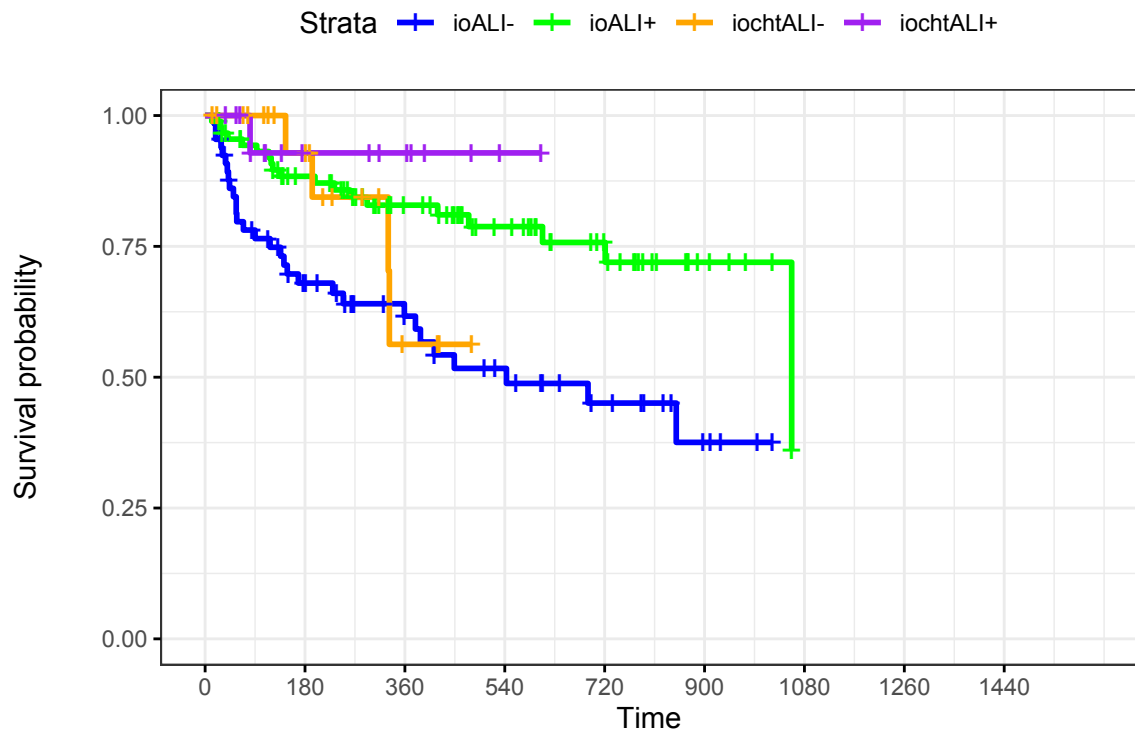

Number at risk

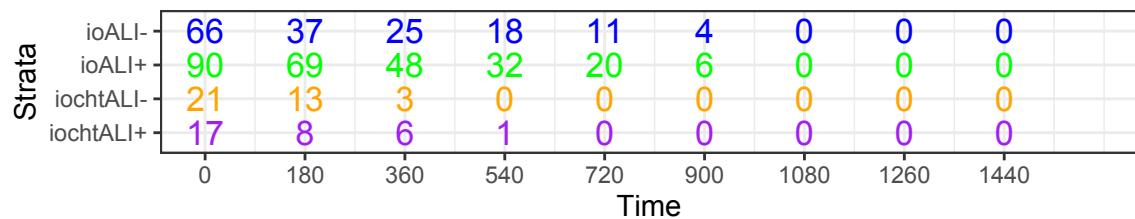

Supplement: mmc1.pdf [file mmc1.pdf]
